# Supplementary material for: Matrix-free human lung organoids derived from induced pluripotent stem cells to model lung injury
Source: PubMed Central journal article supplement (PMC11657174; doi:10.1186/s13287-024-04106-3), 2024-12-18
Supplement: 13287_2024_4106_MOESM1_ESM.pdf [file 13287_2024_4106_MOESM1_ESM.pdf]

## **Supplemental Information**

### **Matrix-free Human Lung Organoids Derived From Induced Pluripotent Stem Cells To Model Lung Injury**

Bettina Budeus, Chiara Kroepel, Lisa Marie Stasch, Diana Klein

## Supplemental Figures and Legends

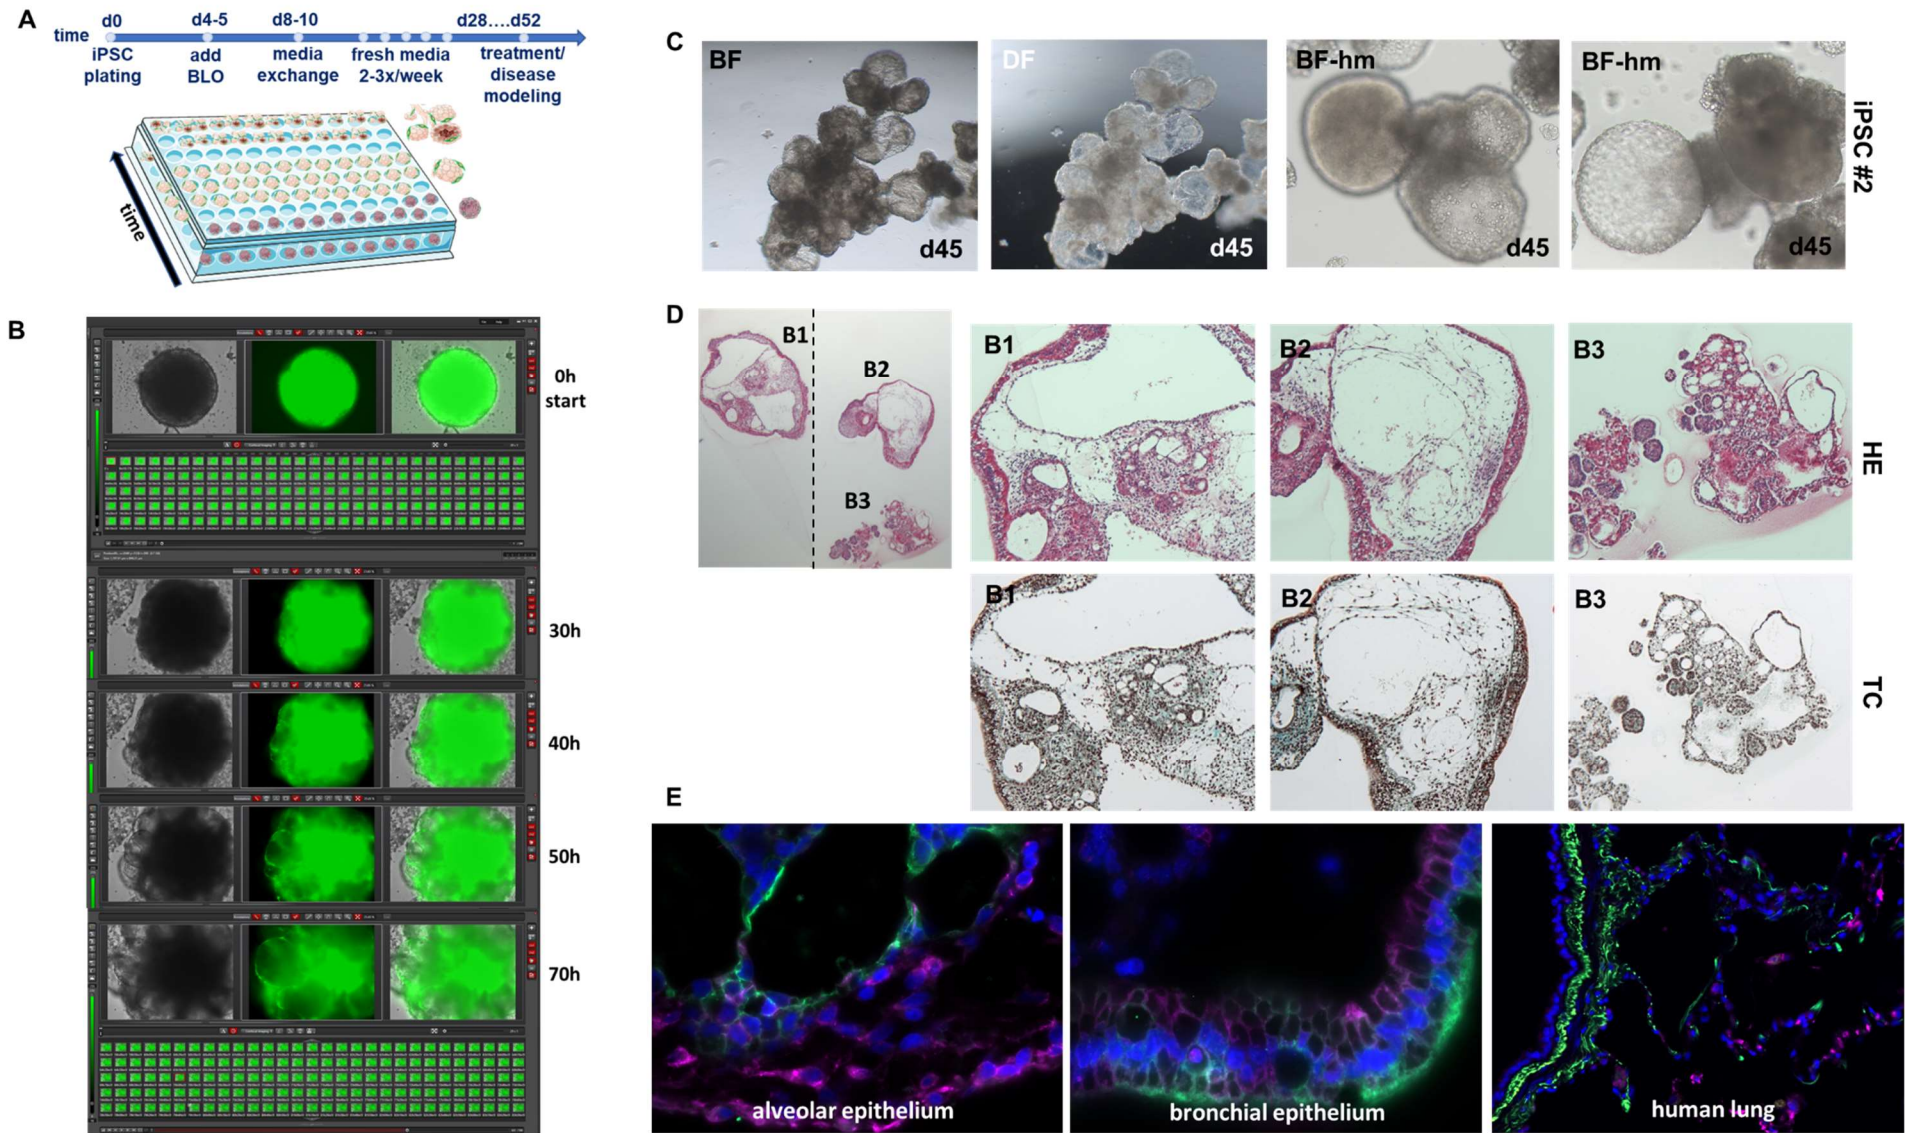

Figure S1. Characterization of free-floating iPSC-derived human LuOrgs, related to Figure 1.

**(A)** Scheme for the experimental design including the time line. (Created using Servier Medical Art; licensed under CC BY 4.0). **(B)** Continuous live cell imaging of GFP-transduced iPSCs (for better visualization) to track the lung structures forming. iPSCs were cultured as EBs in ULA-plates for 4-5 days prior BLOB medium addition. After another 4-5 days, medium was exchanged and recording started (d0) Representative screenshots are shown. **(C)** Bright-field (BF) and dark-field (DF) images of LuOrgs generated matrix-free from human iPSCs in ultra-low attachment plates at indicated time points using the 5x and 20x objective of an inverted microscope. **(D)** Histology staining of paraffin-embedded sections of the lung-like regions of LuOrgs using trichrome (TC) and hematoxylin and eosin (HE) staining. B1-B3 represent different LuOrg structures within the same section. Normal human lung tissue was included as positive control. Magnification: 5x. **(E)** Immunofluorescence staining of paraffin-embedded sections of LuOrgs representing different the lung-like regions for the lung epithelial markers ECAD (green). Nuclei were counterstained using DAPI (blue).

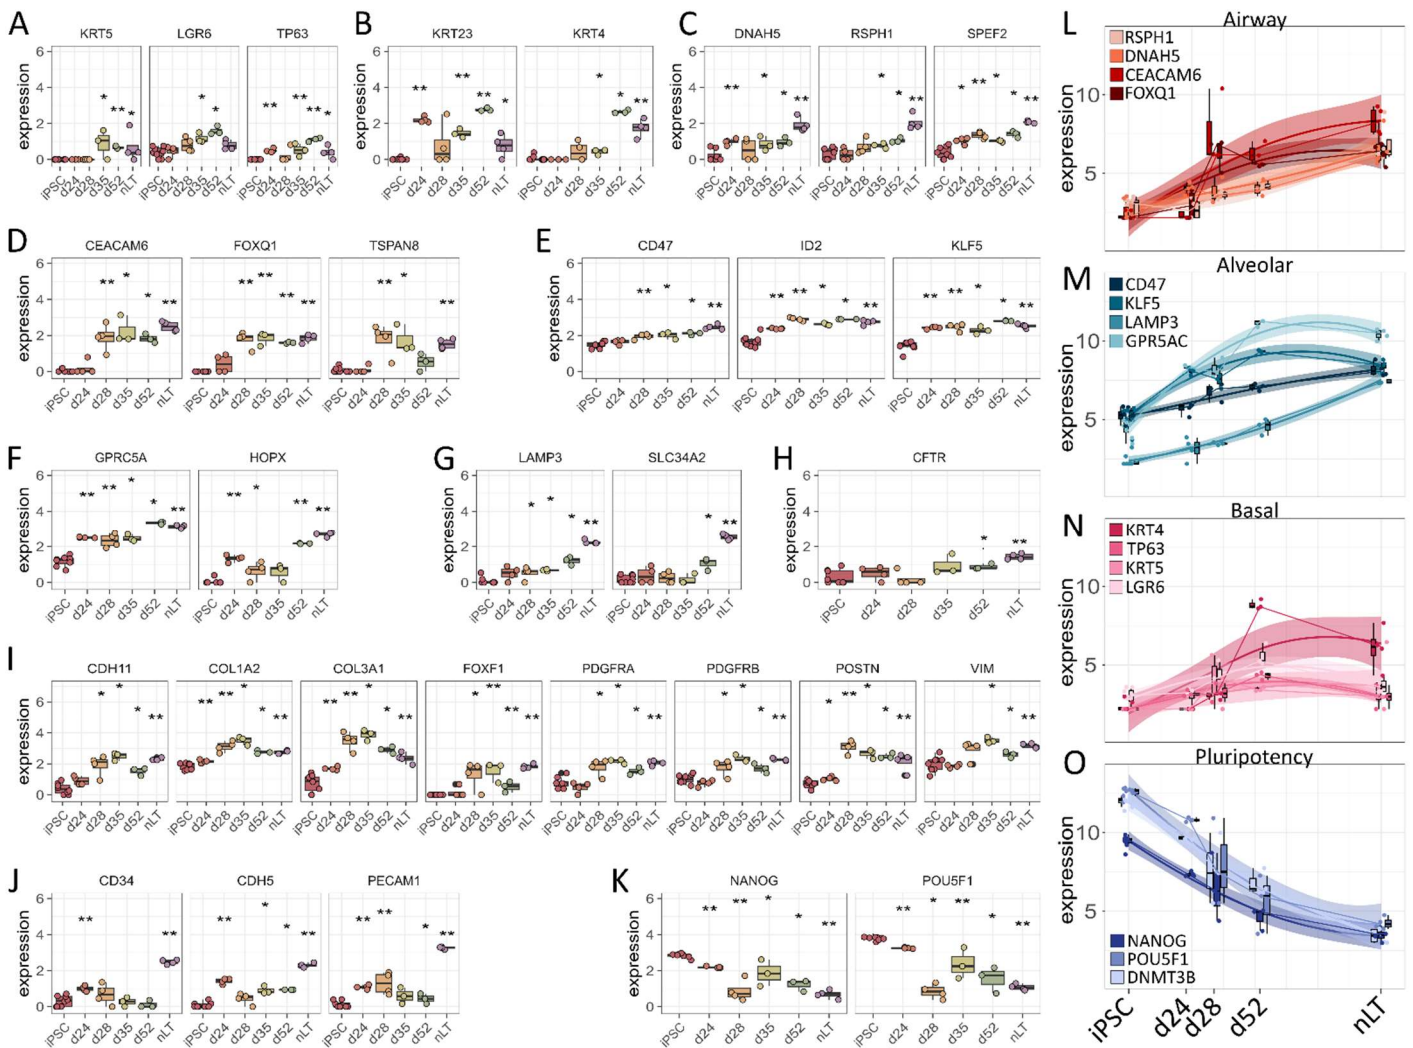

**Figure S2. Molecular differentiation of six time points of generated lung cells, related to Figure 2.**

(A - K) Normalized expression of iPSCs (8 samples), generated lung organoids at d24 (4 samples), d28 (4 samples), d35 (3 samples), d52 (3 samples) and nLT (4 samples) signature genes for (A) basal, (B) suprabasal, (C) ciliated, (D) goblet, (E) alveolar, (F) AECI, (G) AECII, (H) ionocyte, (I) fibroblastic, (J) endothelial and (K) pluripotent cells. (L-O) Normalized expression of selected genes categorized as (L) airway, (M) alveolar, (N) basal, and (O) pluripotency in iPSCs, d24, d28, d52 and nLT. Trend is calculated by Local Polynomial Regression Fitting (Loess). Mann-Whitney  $U$  test. \* = 0.05, \*\* = 0.01, \*\*\* = 0.001. Shown are only comparisons between iPSCs and other timepoints.

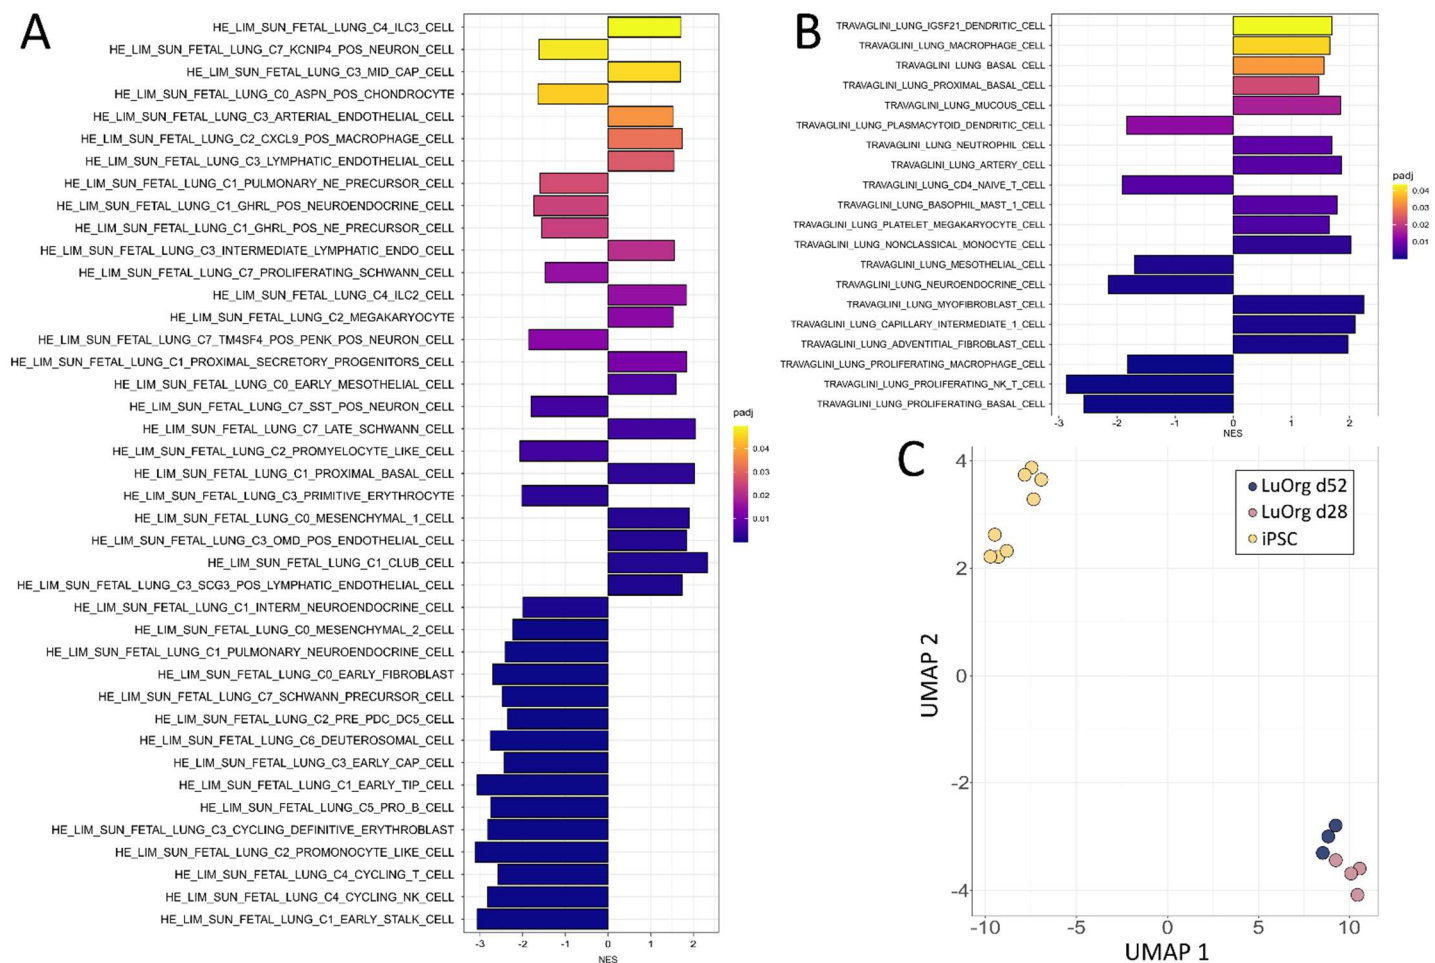

**Figure S3. Lung cell-type dependent molecular characteristics of free-floating iPSC-derived human LuOrgs, related to Figure 2.**

Normalized expression scores (x-axis) and adjusted p-values (color) of two marker gene sets, **(A)** the HE\_LIM\_SUN<sup>12</sup> and **(B)** the TRAVAGLINI<sup>11</sup> lung cell-type gene sets for significantly upregulated and downregulated gene sets using the bulk RNAseq data sets of generated LuOrgs (d52) and donor cells (iPSCs) depicted in Fig. 2A. **(C)** Uniform Manifold Approximation and Projection for Dimension Reduction (UMAP) representation of two batches of iPSCs (each four), three d28 and three d52 lung organoids using all expressed genes in all samples.

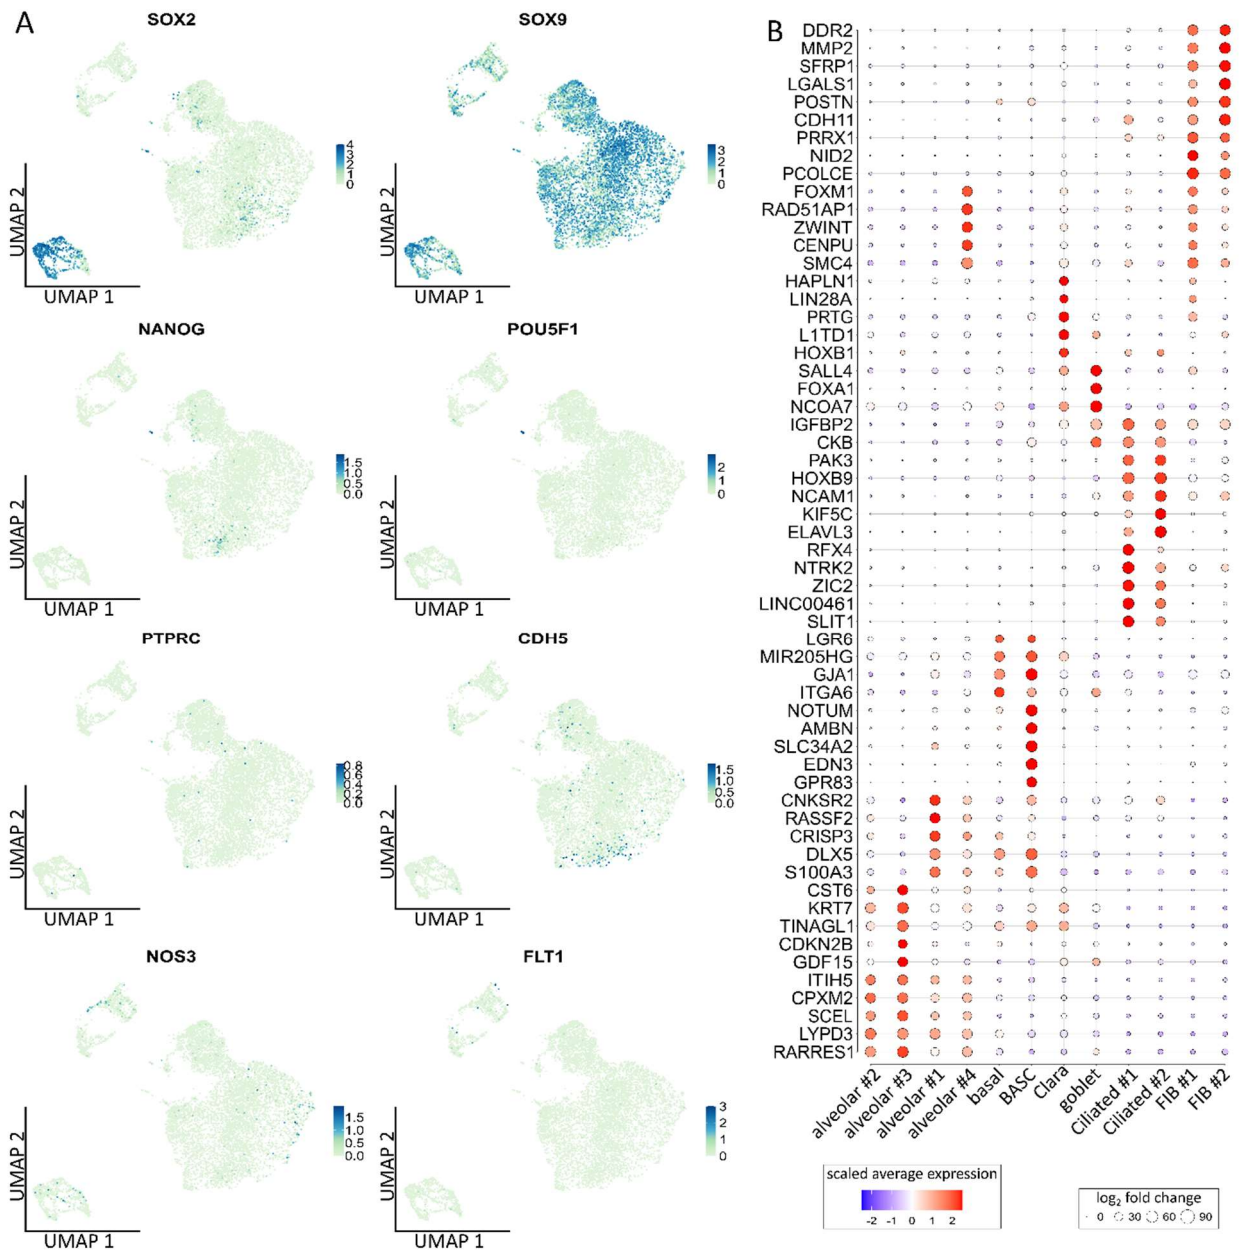

**Supplemental Figure S4: Single cell analysis of the composition of lung organoids, related to Figure 3.**

(A) Expression map of SOX2, SOX9, NANOG, POU5F1, PTPRC, CDH5, NOS3, and FLT1 in all clusters (N=3 biological replicates). (B) Dot plot of top five differentially expressed genes per cluster. Size of the dots indicate the percentage of cells in which this gene was found, the color indicates the normalized value of the expression.

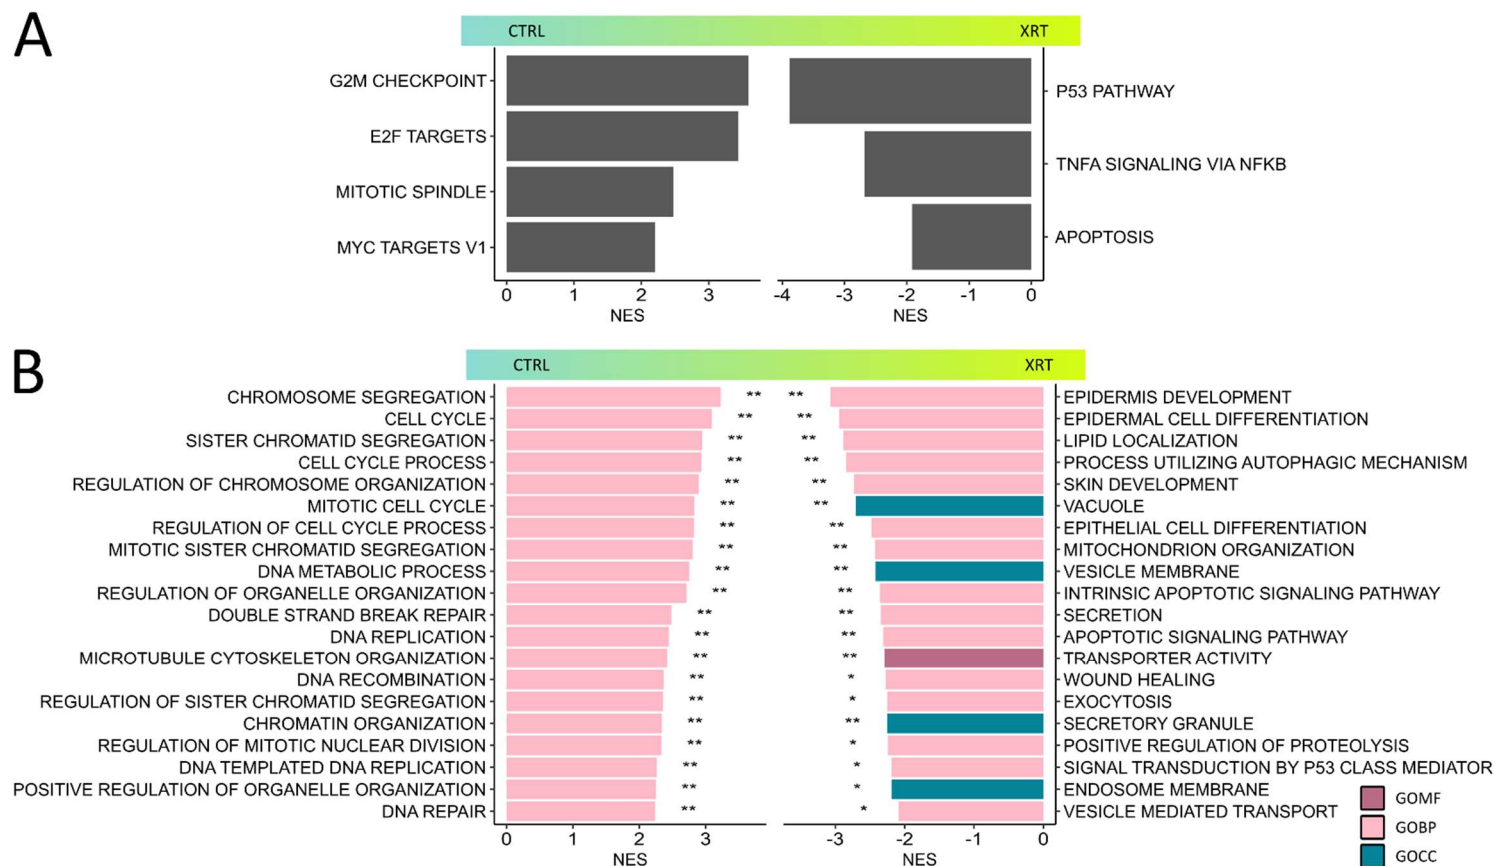

**Supplemental Figure S5. Molecular characterization of response of LuOrgs to RT, related to Figure 4.**

Significantly enriched Hallmark (**A**) and significantly enriched C5 ontology (**B**) gene sets showing normalized enrichment scores (NES) for significantly upregulated and downregulated gene sets during RT (bulk RNAseq). BP, biological process; CC, cellular component; MF, molecular function. P-values are calculated by adaptive multi-level split Monte-Carlo scheme (fgsea R-package)

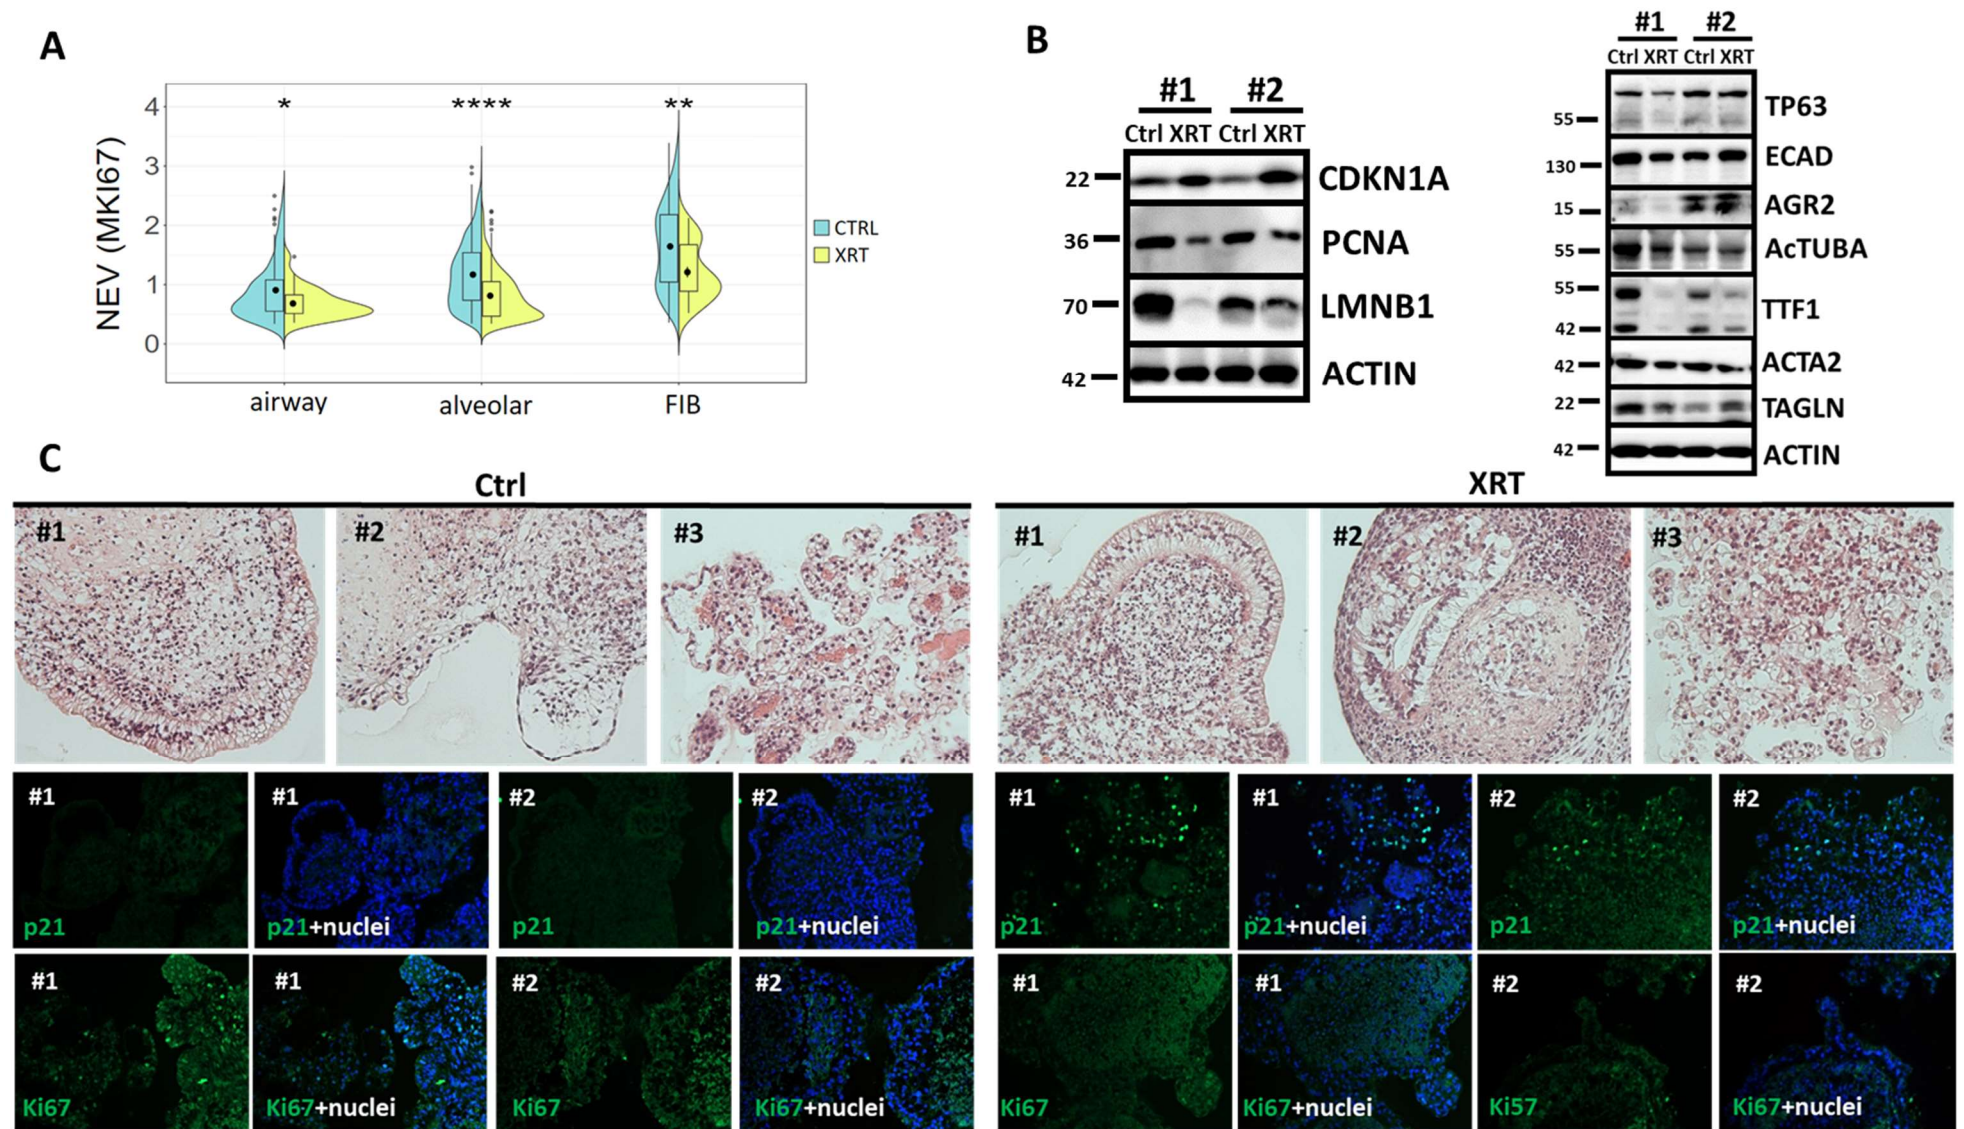

**Supplemental Figure S6. Senescence induction in LuOrgs in response to RT, related to Figure 4-7.**

(A) Normalized expression values as violin plots of MKI67 that is associated with cellular proliferation and ribosomal RNA transcription of each cluster before (CTRL) and after irradiation (XRT) for each cells expressing the marker. (B) Expression levels of the indicated proteins (senescence as well as



lung cell type markers) were analyzed in whole protein lysates of cultured LuOrgs (96 hours after XRT with 10Gy). Beta-Actin was included as loading control. Molecular weight markers are indicated. Representative blots are shown. **(D)** HE histology staining of paraffin-embedded sections of LuOrgs following radiation treatment. Magnification: 20x. **(E)** Immunofluorescence staining of paraffin-embedded sections of LuOrgs representing different the lung-like regions for the senescence marker CDKN1A (green) and the proliferation marker MKI67 (green). # numbers indicate different biological replicates. Nuclei were counterstained using DAPI (blue). Magnification: 10x.

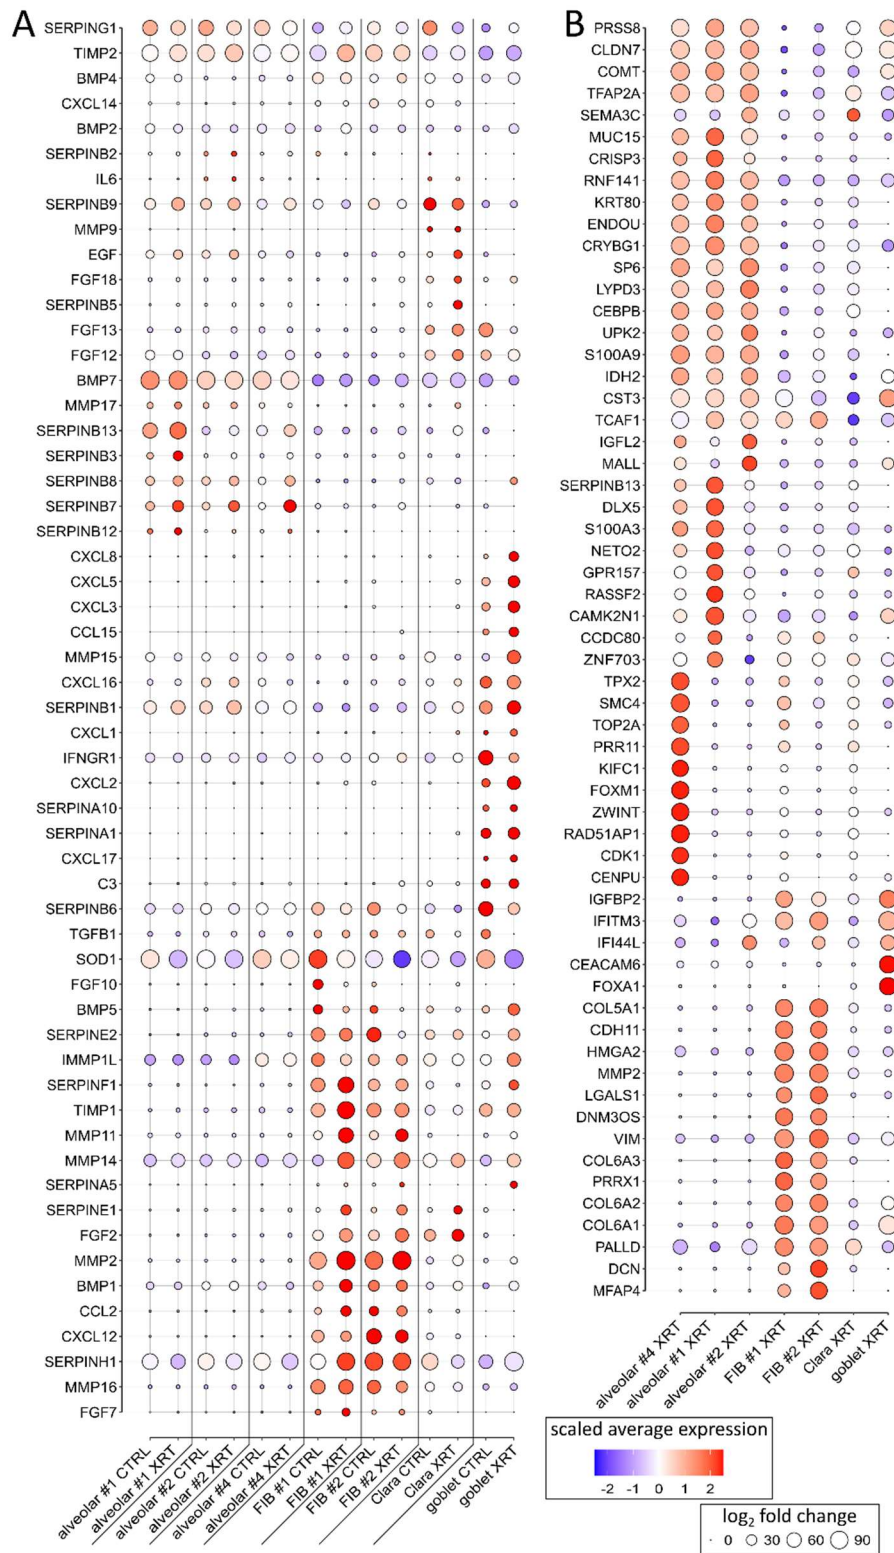

**Supplemental Figure S7. Senescence-associated secretory phenotype (SASP) factor expression of LuOrgs in response to RT, related to Figure 6.**

(A) Expression of known SASP genes in the clusters in which cells potentially became senescent following RT. (B) Dot plot of the top five differentially expressed genes per cluster after irradiation. Size of the dots indicate the percentage of cells in which this gene was found, the color indicates the normalized value of the expression..

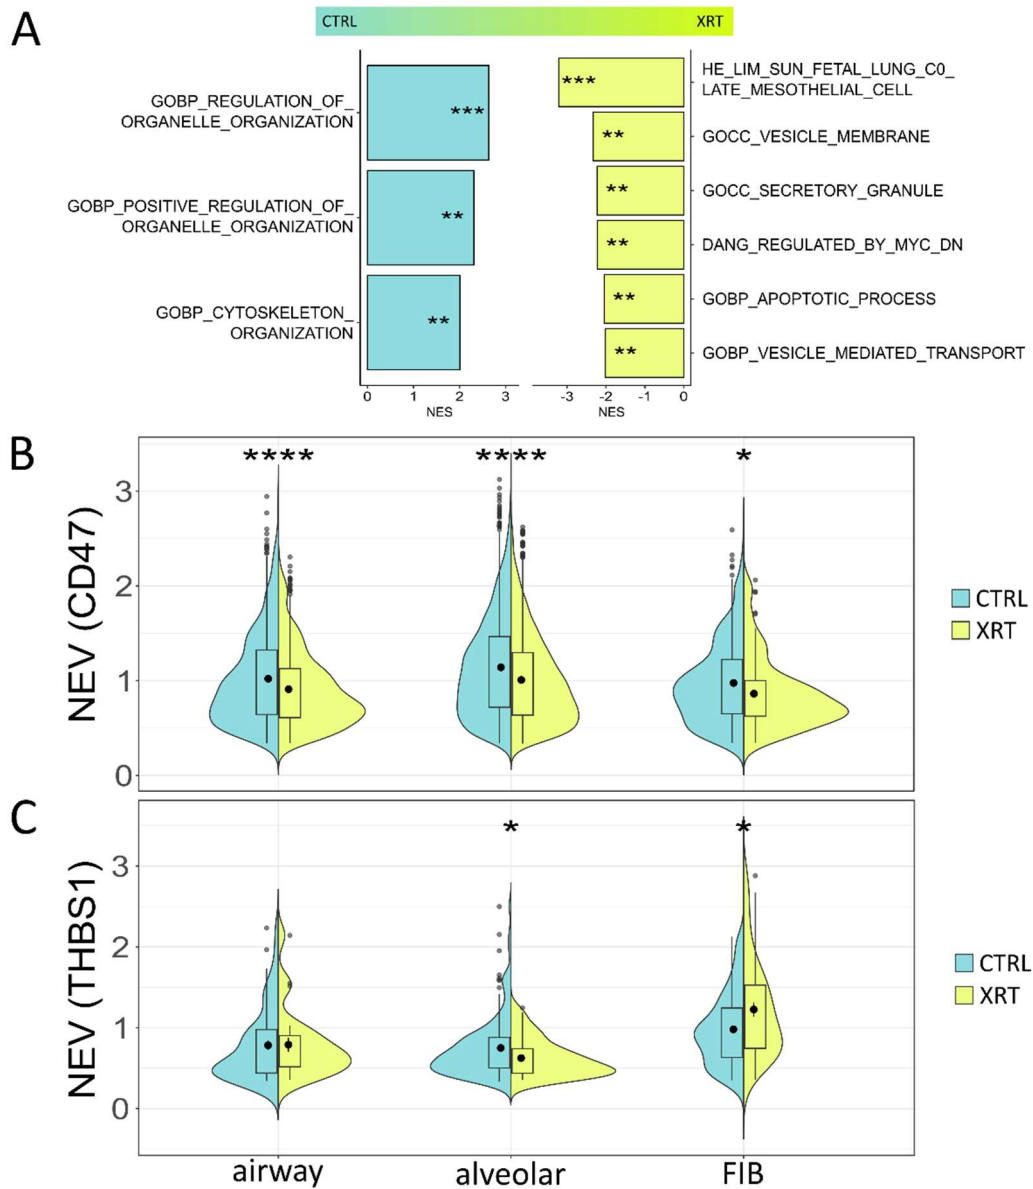

**Supplemental Figure S8. The CD47-THBS1-axis of LuOrgs in response to RT, related to Figure 7.**

(A) Significantly enriched gene sets containing CD47 showing normalized enrichment scores (NES) for significantly upregulated and downregulated gene sets (bulk RNAseq). Normalized expression values as violin plots of (B) CD47 and (C) THBS1 of each cluster before (CTRL) and after irradiation (XRT) for each cells expressing the marker.

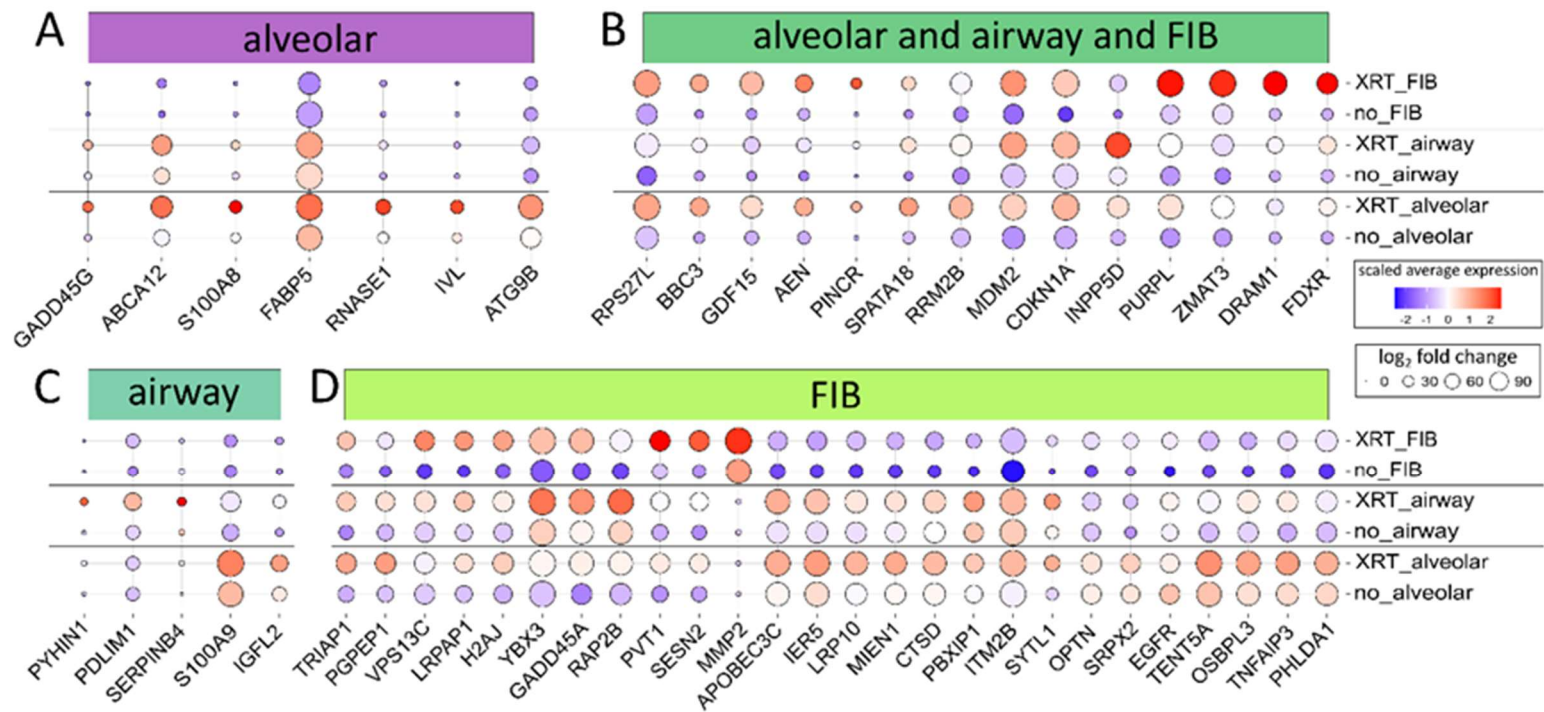

**Supplemental Figure S9. Expression of significant genes in alveolar, airway and FIB meta cluster, related to Figure 7.**

Dot plot of the top differentially expressed genes per meta cluster before and after irradiation. Size of the dots indicate the percentage of cells in which this gene was found, the color indicates the normalized value of the expression.

**Table S1. RT-induced genes in lung organoid meta clusters, related to Figure 7.**

Genes differentially expressed following RT in alveolar, airway, and FIB meta clusters as confirmed in the bulk RNAseq data sets.

| 1_2down   | 2_3down | 1_2_3up  | 1_2up | 1_3up   | 1down   | 1up     | 2_3down | 2down    | 3down    | 3up     |       |
|-----------|---------|----------|-------|---------|---------|---------|---------|----------|----------|---------|-------|
| 8         | 15      | 7        | 6     | 115     | 8       | 41      | 5       | 5        | 28       | 51      |       |
| VDR86-AS  | CDKN1A  | CENPF    | STC1  | MKI67   | IVL     | HELLS   | PHLDA3  | IGFL2    | SESN2    | SFRP1   |       |
|           | H2AC6   | MDM2     | SMC4  | LGR6    | TPX2    | ABCA12  | MYBL2   | BLOC1S2  | S100A9   | GADD45A | RFLNB |
|           | CEL     | BBC3     | MCM6  | VIM     | PRR11   | RNASE1  | MSH6    | DDB2     | PDLIM1   | SRPX2   | IRX3  |
|           | CDKN2B  | GDF15    | CDT1  | COL4A2  | ATAD2   | S100A8  | H1-3    | PHPT1    | PYHIN1   | PHLDA1  | RRM1  |
| SERPINB3  | RPS27L  | RAD51AP1 | ITGA9 | H4C3    | FABP5   | POC1A   | PPM1D   | SERPINB4 | OSBPL3   | HMGB3   |       |
| KRTAP19-1 | PINCR   | MCM5     | HIF3A | ASPM    | ATG9B   | CDC25B  |         |          | PGPEP1   | FADS1   |       |
|           | ZMAT3   |          |       | LMNB1   | GADD45G | DBF4    |         |          | YBX3     | SMC1A   |       |
|           | AEN     |          |       | MCM3    |         | CEP135  |         |          | ITM2B    | RANBP1  |       |
|           | RRM2B   |          |       | NASP    |         | TK1     |         |          | MIEN1    | DPYSL2  |       |
|           | PURPL   |          |       | TOP2A   |         | SPAG5   |         |          | SYTL1    | VRK1    |       |
|           | SPATA18 |          |       | E2F1    |         | TACC3   |         |          | TENT5A   | TUBB2B  |       |
|           | FDXR    |          |       | AURKB   |         | FBXO17  |         |          | TNFAIP3  | SEPTIN6 |       |
|           | INPP5D  |          |       | LDHA    |         | PHF19   |         |          | IER5     | TPI1    |       |
|           | DRAM1   |          |       | GINS2   |         | SPON1   |         |          | RAP2B    | MCM7    |       |
|           |         |          |       | CDK1    |         | ODC1    |         |          | LRPAP1   | DEK     |       |
|           |         |          |       | CENPE   |         | NEK2    |         |          | H2AJ     | H2AZ1   |       |
|           |         |          |       | MCM10   |         | DSCC1   |         |          | LRP10    | DHCR24  |       |
|           |         |          |       | SMC2    |         | MYB     |         |          | APOBEC3C | NCAPD2  |       |
|           |         |          |       | TMSB15A |         | MYOZ3   |         |          | EGFR     | NR2F1   |       |
|           |         |          |       | CLSPN   |         | CHTF18  |         |          | PBXIP1   | DHFR    |       |
|           |         |          |       | KIF15   |         | SCCPDH  |         |          | OPTN     | SMAD9   |       |
|           |         |          |       | KIFC1   |         | PRC1    |         |          | PVT1     | HMG2    |       |
|           |         |          |       | MCM4    |         | CDC45   |         |          | CTSD     | CHCHD2  |       |
|           |         |          |       | DLGAP5  |         | CYB5R2  |         |          | VPS13C   | PKM     |       |
|           |         |          |       | UBE2C   |         | ECT2    |         |          | TRIAP1   | ERG     |       |
|           |         |          |       | NCAPH   |         | CEP55   |         |          | MMP2     | USP1    |       |
|           |         |          |       | DTL     |         | MNS1    |         |          |          | HAUS1   |       |
|           |         |          |       | CKS1B   |         | RECQL4  |         |          |          | FRZB    |       |
|           |         |          |       | AURKA   |         | BARD1   |         |          |          | GPI     |       |
|           |         |          |       | PCLAF   |         | CCDC18  |         |          |          | AMOT    |       |
|           |         |          |       | RRM2    |         | INCENP  |         |          |          | EZH2    |       |
|           |         |          |       | HMGB2   |         | SUV39H1 |         |          |          | GJC1    |       |
|           |         |          |       | KIF20B  |         | USP13   |         |          |          | EMP2    |       |
|           |         |          |       | KIF20A  |         | TCF7    |         |          |          | ENO1    |       |
|           |         |          |       | MAD2L1  |         | POLQ    |         |          |          | KLHL23  |       |
|           |         |          |       | CCNB1   |         | HROB    |         |          |          | SCUBE1  |       |
|           |         |          |       | CDCA8   |         | CD320   |         |          |          | MTHFD1  |       |
|           |         |          |       | CDC6    |         |         |         |          |          |         |       |
|           |         |          |       | CDC20   |         |         |         |          |          |         |       |
|           |         |          |       | CHAF1A  |         |         |         |          |          |         |       |
|           |         |          |       | CIP2A   |         |         |         |          |          |         |       |
|           |         |          |       | PTTG1   |         |         |         |          |          |         |       |
|           |         |          |       | CDCA7   |         |         |         |          |          |         |       |
|           |         |          |       | UHRF1   |         |         |         |          |          |         |       |
|           |         |          |       | TMEM97  |         |         |         |          |          |         |       |
|           |         |          |       | FXYD6   |         |         |         |          |          |         |       |
|           |         |          |       | KIF2C   |         |         |         |          |          |         |       |

|  |  |  |  |           |  |  |  |  |  |  |
|--|--|--|--|-----------|--|--|--|--|--|--|
|  |  |  |  | CCNA2     |  |  |  |  |  |  |
|  |  |  |  | RFC3      |  |  |  |  |  |  |
|  |  |  |  | KIF22     |  |  |  |  |  |  |
|  |  |  |  | BIRC5     |  |  |  |  |  |  |
|  |  |  |  | ANLN      |  |  |  |  |  |  |
|  |  |  |  | FANCD2    |  |  |  |  |  |  |
|  |  |  |  | ARHGAP11A |  |  |  |  |  |  |
|  |  |  |  | GMNN      |  |  |  |  |  |  |
|  |  |  |  | TROAP     |  |  |  |  |  |  |
|  |  |  |  | BRCA1     |  |  |  |  |  |  |
|  |  |  |  | CCNB2     |  |  |  |  |  |  |
|  |  |  |  | CENPU     |  |  |  |  |  |  |
|  |  |  |  | HJURP     |  |  |  |  |  |  |
|  |  |  |  | ZWINT     |  |  |  |  |  |  |
|  |  |  |  | DIAPH3    |  |  |  |  |  |  |
|  |  |  |  | CDCA5     |  |  |  |  |  |  |
|  |  |  |  | SGO1      |  |  |  |  |  |  |
|  |  |  |  | FANCI     |  |  |  |  |  |  |
|  |  |  |  | CDCA3     |  |  |  |  |  |  |
|  |  |  |  | DUT       |  |  |  |  |  |  |
|  |  |  |  | HMMR      |  |  |  |  |  |  |
|  |  |  |  | WDHD1     |  |  |  |  |  |  |
|  |  |  |  | CDCA2     |  |  |  |  |  |  |
|  |  |  |  | NCAPG2    |  |  |  |  |  |  |
|  |  |  |  | BLM       |  |  |  |  |  |  |
|  |  |  |  | CENPH     |  |  |  |  |  |  |
|  |  |  |  | FEN1      |  |  |  |  |  |  |
|  |  |  |  | NDC80     |  |  |  |  |  |  |
|  |  |  |  | CENPJ     |  |  |  |  |  |  |
|  |  |  |  | CDC25A    |  |  |  |  |  |  |
|  |  |  |  | NCAPG     |  |  |  |  |  |  |
|  |  |  |  | CKAP2L    |  |  |  |  |  |  |

**Table S2. Key resources table**

| REAGENT or RESOURCE                                                             | SOURCE                                                                | IDENTIFIER                                              |
|---------------------------------------------------------------------------------|-----------------------------------------------------------------------|---------------------------------------------------------|
| <b>Antibodies</b>                                                               |                                                                       |                                                         |
| AQP5 Polyclonal antibody                                                        | Proteintech                                                           | Cat#20334-1-AP                                          |
| SFTPC Polyclonal antibody                                                       | Proteintech                                                           | Cat#10774-1-AP                                          |
| AGR2 Polyclonal antibody                                                        | Proteintech                                                           | Cat#66768-1-Ig                                          |
| alpha-Smooth Muscle Actin Antibody (1A4/asm-1) APC                              | Biotechne Novus                                                       | Cat#NBP2-34522APC                                       |
| CD324 (E-Cadherin) Monoclonal Antibody (DECMA-1), Alexa Fluor™ 488, eBioscience | ThermoFischer                                                         | Cat#53-3249-82                                          |
| CD326 (EpCAM) Monoclonal Antibody (G8.8), PE, eBioscience™                      | ThermoFischer                                                         | Cat#12-5791-82                                          |
| Vimentin Monoclonal Antibody (3H9D1), CoraLite® 594                             | ThermoFischer                                                         | Cat#CL594-60330                                         |
| Podoplanin Monoclonal Antibody (NZ-1.3), APC, eBioscience™                      | ThermoFischer                                                         | Cat#17-9381-42                                          |
| CoraLite® Plus 488-conjugated Caveolin-1 Monoclonal antibody QN:Q1604572        | Proteintech                                                           | Cat#CL488-66067                                         |
| CoraLite® Plus 488-conjugated acetylated Tubulin (Lys40) Monoclonal antibody    | Proteintech                                                           | Cat#CL488-66200                                         |
| CoraLite® Plus 488-conjugated p63 Polyclonal antibody                           | Proteintech                                                           | Cat#CL488-12143                                         |
| CD34 Class II, Clone QBEnd 10                                                   | Agilent/ DAKO                                                         | Cat#M716501-2                                           |
| Hoechst 33342                                                                   | ThermoFischer                                                         | Cat#H1399                                               |
| ALEXA FLUOR 555                                                                 | ThermoFischer                                                         | Cat#A21424                                              |
| ALEXA FLUOR 488                                                                 | ThermoFischer                                                         | Cat#A11034                                              |
| <b>Biological samples</b>                                                       |                                                                       |                                                         |
| Normal lung tissue (human)                                                      | This paper; Steens et al. <sup>90</sup> ; Sentek et al. <sup>89</sup> | doi.org/10.1002/sctm.20-0191; 10.3389/fonc.2024.1406268 |
| <b>Chemicals, peptides, and recombinant proteins</b>                            |                                                                       |                                                         |
| Hu Recom FGF-7 ACF                                                              | StemCell Technologies                                                 | Cat#78186.1                                             |
| HURecom FGF-10(KGF-2) ACF                                                       | StemCell Technologies                                                 | Cat#78173.1                                             |
| L-Ascorbic acid                                                                 | Sigma-Aldrich                                                         | Cat#A92902                                              |
| Monothioglycerol                                                                | Sigma-Aldrich                                                         | Cat#M6145                                               |
| Bovine Serum Albumin                                                            | Roche                                                                 | Cat#BSAVHS-RO                                           |
| VitronectinXF                                                                   | StemCell Technologies                                                 | Cat#100-0763                                            |
| Laduviglusib (CHIR-99021)                                                       | Biozol/Selleckchem                                                    | Cat#S1263                                               |
| C12FDG                                                                          | Invitrogen                                                            | Cat#D2893                                               |
| DMEM-F12                                                                        | Invitrogen                                                            | Cat#11330-032                                           |
| B-27™ Supplement (50x),                                                         | ThermoFischer/Gibco                                                   | Cat#17504044                                            |
| N-2 Supplement (100x)                                                           | ThermoFischer/Gibco                                                   | Cat#17502048                                            |
| Hydrocortisin Stock Solution                                                    | StemCell Technologies                                                 | Cat#7926                                                |
| 0,2% Heparin Solution                                                           | StemCell Technologies                                                 | Cat#7980                                                |
| L-Ascorbic acid                                                                 | Sigma-Aldrich                                                         | Cat#A92902                                              |
| 7-AAD                                                                           | Invitrogen                                                            | Cat#A1310                                               |
| TrypLE                                                                          | ThermoFischer                                                         | Cat#12604013                                            |
| Normal goat serum                                                               | ThermoFischer                                                         | Cat#31873                                               |
| Fetal calf serum                                                                | ThermoFischer/Gibco                                                   | Cat#A5256701                                            |

|                                                       |                              |                                                                                                                                                                                                           |
|-------------------------------------------------------|------------------------------|-----------------------------------------------------------------------------------------------------------------------------------------------------------------------------------------------------------|
| ATRA                                                  | StemCell Technologies        | Cat#72262                                                                                                                                                                                                 |
| Critical commercial assays                            |                              |                                                                                                                                                                                                           |
| Rhapsody cDNA Kit                                     | BD                           | Cat#633773                                                                                                                                                                                                |
| Human Single-Cell Multiplexing Kit                    | BD                           | Cat#633781                                                                                                                                                                                                |
| BD Rhapsody WTA Amplification Kit                     | BD                           | Cat#633801                                                                                                                                                                                                |
| RNeasy Plus Mini Kit (50)                             | Qiagen                       | Cat#74134                                                                                                                                                                                                 |
| QuantiTect Rev. Transcription Kit (50)                | Qiagen                       | Cat#205311                                                                                                                                                                                                |
| qPCR 2X MasterMix for SYBR® Assay ROX                 | Eurogentec                   | Cat#05-SN2X-03T                                                                                                                                                                                           |
| Gentle Cell dissociation Reagent cGMP                 | StemCell Technologies        | Cat#100-0485                                                                                                                                                                                              |
| CellAdhere Dilution Buffer                            | StemCell Technologies        | Cat#7183                                                                                                                                                                                                  |
| mTeSR1 Complete Kit GMP                               | StemCell Technologies        | Cat#85850                                                                                                                                                                                                 |
| Deposited data                                        |                              |                                                                                                                                                                                                           |
| Raw and analyzed data (bulk RNA)                      | This paper                   | GEO: GSE275539                                                                                                                                                                                            |
| Raw and analyzed data (single cell)                   | This paper                   | GEO: (already uploaded, waiting for confirmation)                                                                                                                                                         |
| GSEA (of single cell gene sets in bulk RNA data sets) | This paper                   | Table S1                                                                                                                                                                                                  |
| Experimental models: Cell lines                       |                              |                                                                                                                                                                                                           |
| SCTi003 iPSC cell line (iPSC #1)                      | StemCell Technologies        | Cat#200-0511                                                                                                                                                                                              |
| iPS01 iPSC cell line (iPSC #2)                        | ALSTEM Inc                   | Cat#iPS01                                                                                                                                                                                                 |
| Oligonucleotides                                      |                              |                                                                                                                                                                                                           |
| CDK1_fw GGAAACCAGGAAGCCTAGCATC                        | This paper / metabion        | N/A                                                                                                                                                                                                       |
| CDK1_rev GGATGATTCAGTGCCATTTT GCC                     | This paper / metabion        | N/A                                                                                                                                                                                                       |
| LMNB1_fw GAGAGCAACATGATGCCCAAGTG                      | This paper / metabion        | N/A                                                                                                                                                                                                       |
| LMNB1_rev GTTCTTCCCTGGCACTGTTGAC                      | This paper / metabion        | N/A                                                                                                                                                                                                       |
| CDKN1A_fw AGGTGGACCTGGAGACTCTCAG                      | This paper / metabion        | N/A                                                                                                                                                                                                       |
| CDKN1a_rev TCCTCTTGAGAGAAGATCAGCCG                    | This paper / metabion        | N/A                                                                                                                                                                                                       |
| bACT_fw CACCATTGGCAATGAGCGGTTTC                       | This paper / metabion        | N/A                                                                                                                                                                                                       |
| bACT_rev AGGTCTTTGCGGATGTCCACGT                       | This paper / metabion        | N/A                                                                                                                                                                                                       |
| Software and algorithms                               |                              |                                                                                                                                                                                                           |
| Hisat 2 v2.2.1                                        | 10.1101/gr.275193.120        | <a href="http://daehwankimlab.github.io/hisat2/manual/">http://daehwankimlab.github.io/hisat2/manual/</a>                                                                                                 |
| CytExpert Software                                    | Beckman Coulter              | <a href="https://beckman.de/en/flow-cytometry/research-flow-cytometers/cytoflex/cytoflex-startup-guide">https://beckman.de/en/flow-cytometry/research-flow-cytometers/cytoflex/cytoflex-startup-guide</a> |
| TrimGalore v0.6.0                                     | 10.14806/ej.17.1.200         | <a href="https://github.com/FelixKrueger/TrimGalore">https://github.com/FelixKrueger/TrimGalore</a>                                                                                                       |
| R-package GenomicAlignments v1.40.0                   | 10.1371/journal.pcbi.1003118 | <a href="https://bioconductor.org/packages/release/bioc/html/GenomicAlignments.html">https://bioconductor.org/packages/release/bioc/html/GenomicAlignments.html</a>                                       |
| Cwl-runner v2.0                                       |                              | <a href="https://bitbucket.org/CRSwDev/cwl/src/master/">https://bitbucket.org/CRSwDev/cwl/src/master/</a>                                                                                                 |



|                         |                                                                                                                                                                                                                                                                  |                                                                                                                                                                 |
|-------------------------|------------------------------------------------------------------------------------------------------------------------------------------------------------------------------------------------------------------------------------------------------------------|-----------------------------------------------------------------------------------------------------------------------------------------------------------------|
| Seurat v4.0             | 10.1016/j.cell.2021.04.048                                                                                                                                                                                                                                       | <a href="https://satijalab.org/seurat/">https://satijalab.org/seurat/</a>                                                                                       |
| EnhancedVolcano v1.22.0 | Blighe K, Rana S, Lewis M (2024). EnhancedVolcano: Publication-ready volcano plots with enhanced colouring and labeling. R package version 1.22.0, <a href="https://github.com/kevinblighe/EnhancedVolcano">https://github.com/kevinblighe/EnhancedVolcano</a> . | <a href="https://bioconductor.org/packages/release/bioc/html/EnhancedVolcano.html">https://bioconductor.org/packages/release/bioc/html/EnhancedVolcano.html</a> |
| ggalluvial v0.12.5      | 10.21105/joss.02017                                                                                                                                                                                                                                              | <a href="https://cran.r-project.org/web/packages/ggalluvial/">https://cran.r-project.org/web/packages/ggalluvial/</a>                                           |
| nVennR v0.2.3           | 10.1093/bioinformatics/bty109                                                                                                                                                                                                                                    | <a href="https://github.com/cran/nVennR">https://github.com/cran/nVennR</a>                                                                                     |
| fgsea v1.30.0           | 10.1101/060012                                                                                                                                                                                                                                                   | <a href="https://bioconductor.org/packages/release/bioc/html/fgsea.html">https://bioconductor.org/packages/release/bioc/html/fgsea.html</a>                     |
| SCpubr v2.0.0           | 10.1101/2022.02.28.482303                                                                                                                                                                                                                                        | <a href="https://github.com/enblacar/SCpubr">https://github.com/enblacar/SCpubr</a>                                                                             |
| ggplot2 v3.5.1          | Wickham H (2016). ggplot2: Elegant Graphics for Data Analysis. Springer-Verlag New York. ISBN 978-3-319-24277-4                                                                                                                                                  | <a href="https://ggplot2.tidyverse.org/">https://ggplot2.tidyverse.org/</a>                                                                                     |
| Other                   |                                                                                                                                                                                                                                                                  |                                                                                                                                                                 |
| BIOFLOAT 96-well plate  | SARSTEDT                                                                                                                                                                                                                                                         | Cat#83.3925.400                                                                                                                                                 |
